# Supplementary material for: Nicotine Potentially Alters Endothelial Inflammation and Cell Adhesion via LGALS9
Source: MDPI journal article supplement (doi:10.3390/jcdd11010006), 2023-12-23
Supplement: s1 [file s1]

A

KEGG Pathways

Nic vs. Control

B

Ang II vs. Control

C

Comb vs. Control

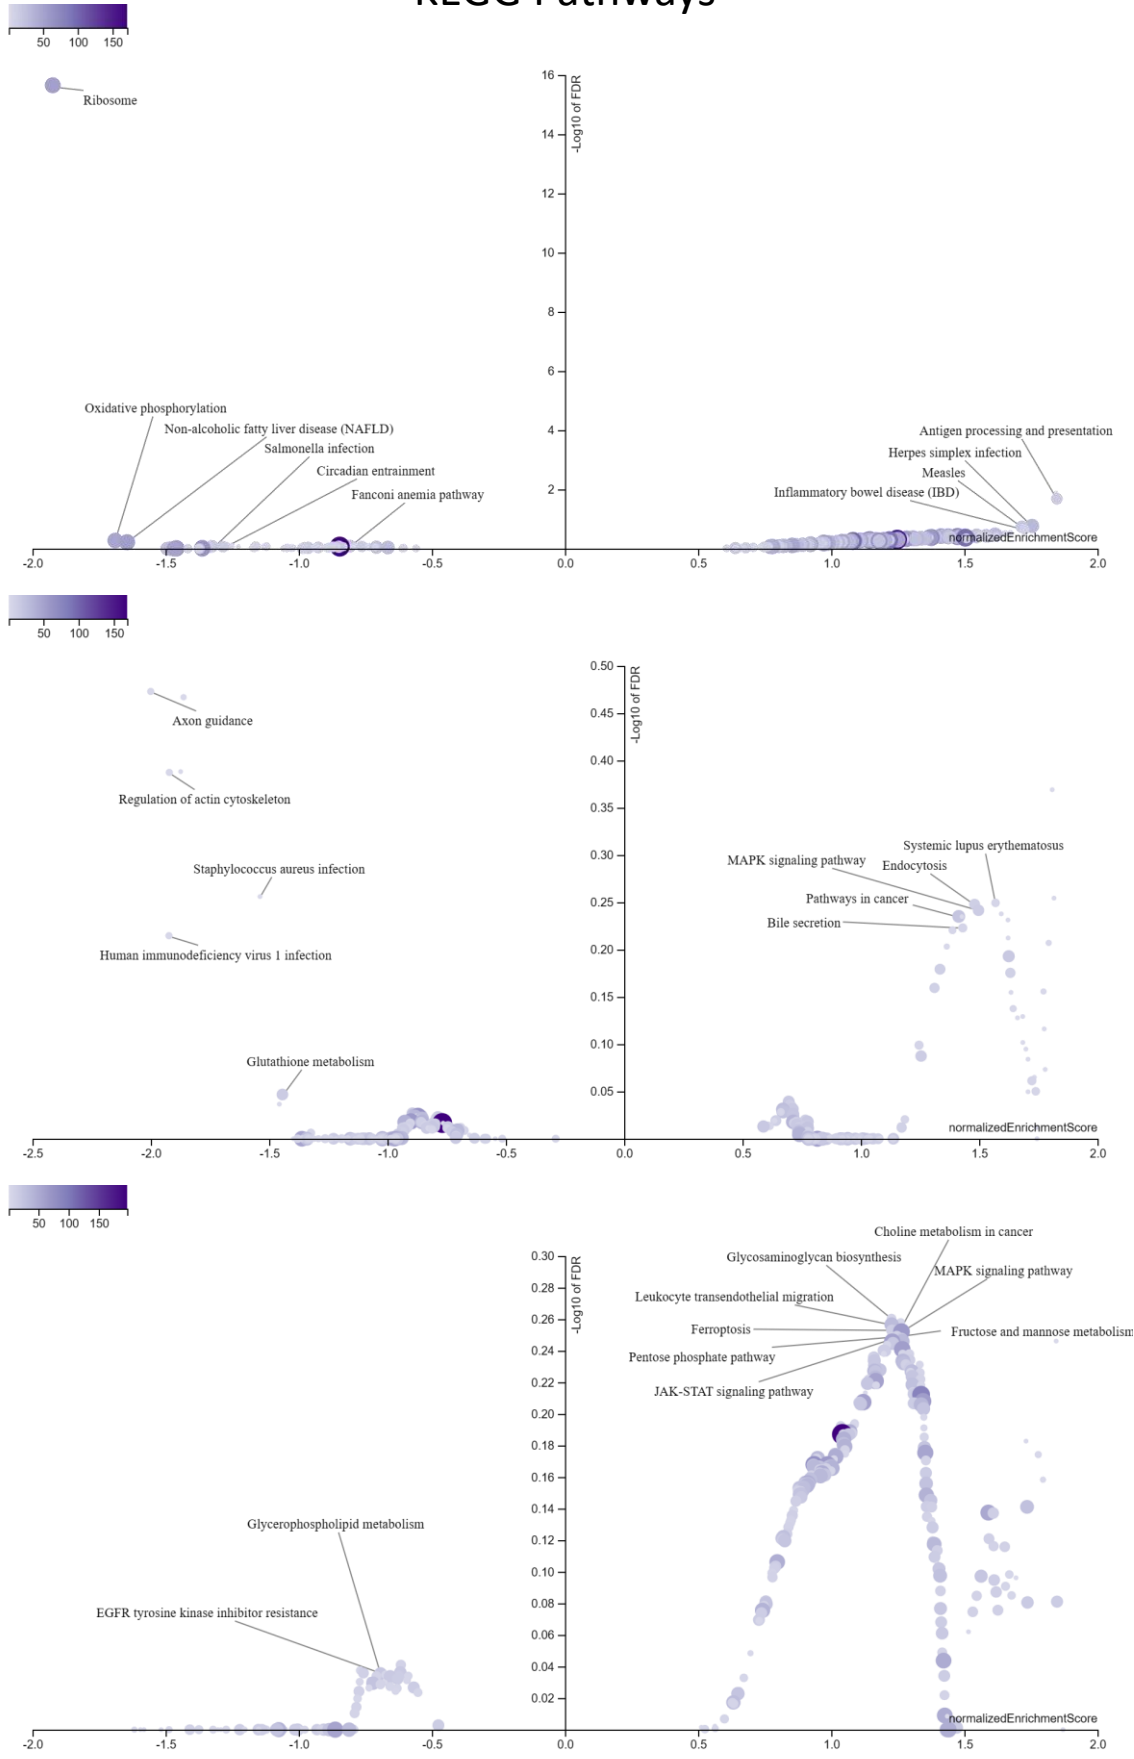

**Supplementary Figure S1. KEGG Pathway Gene Set Enrichment Analysis.** A-C: Volcano plots show enriched KEGG pathways from RNA-Seq analysis of HAoECs exposed to nicotine (Nic) at 100 nM (A), angiotensin II (Ang II) (B) at 100 nM and the combination (Comb) of Nic (100 nM) and Ang II (100 nM) (C) vs. Control.

A

## Biological Process

Nic vs. Control

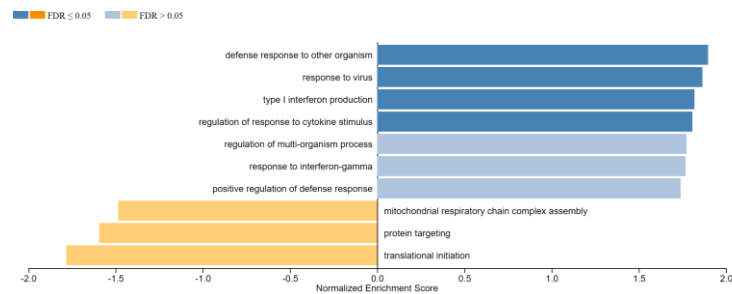

Ang II vs. Control

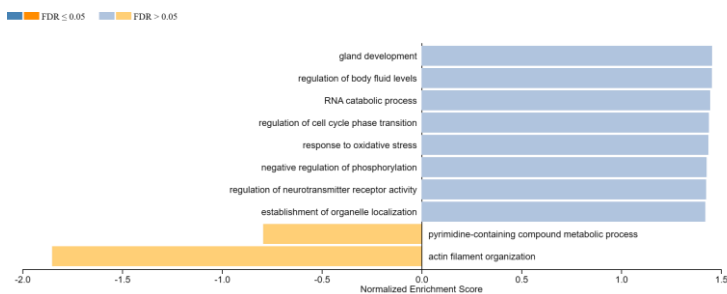

Comb vs. Control

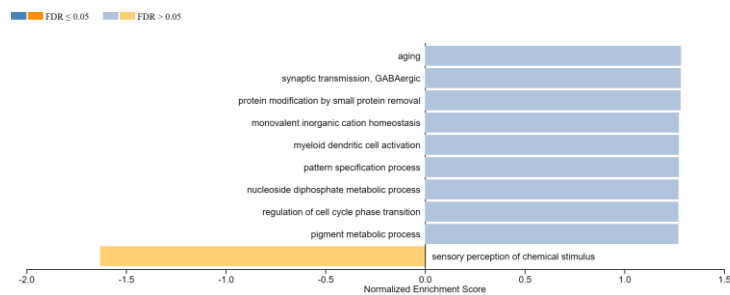

B

## Cellular Component

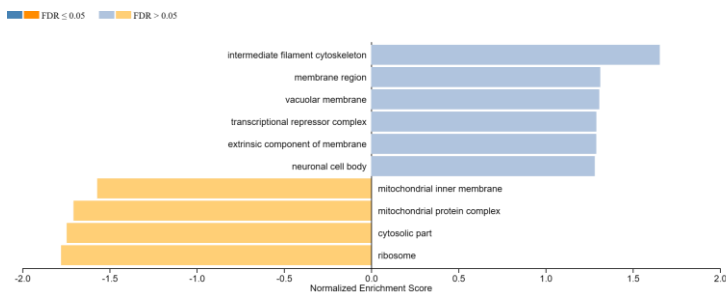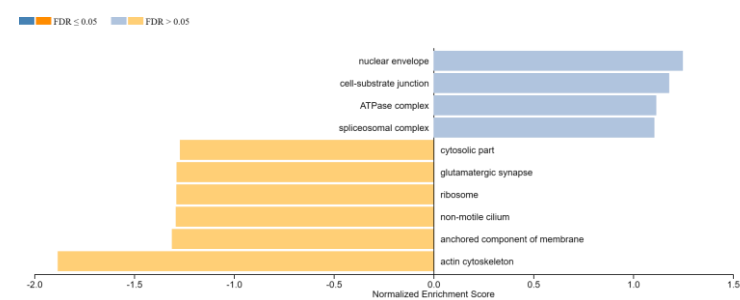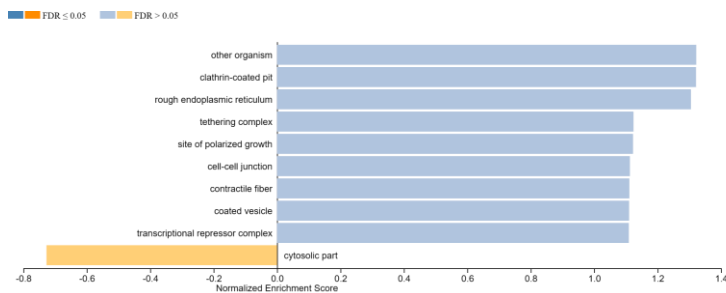

C

## Molecular Function

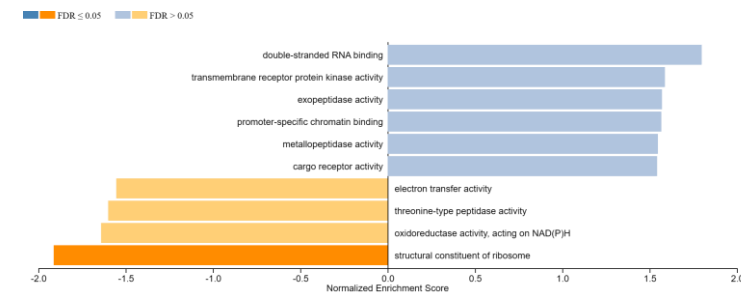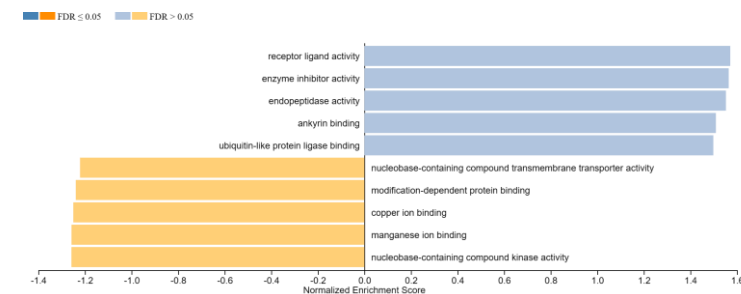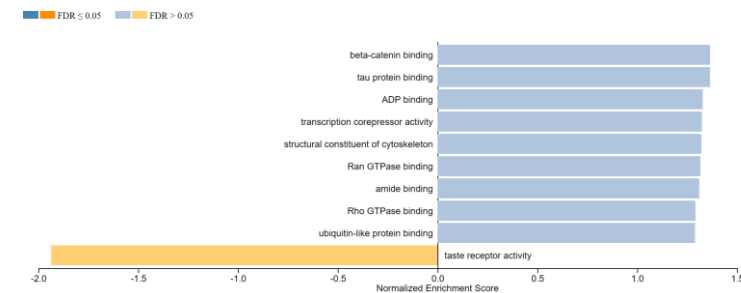

**Supplementary Figure S2. Gene Ontology Analysis.** A-C: Bar graphs show overrepresented gene sets in biological processes (A), cellular components (B), and molecular functions (C) from RNA-Seq analysis of HAoECs exposed to nicotine (Nic) at 100 nM, angiotensin II (Ang II) at 100 nM, and the combination (Comb) of Nic (100 nM) and Ang II (100 nM) vs. Control.
